MS ID#: BIORXIV/2020/238329

MS TITLE: Genome Diversity in Ukraine

Taras K. Oleksyk, Walter W. Wolfsberger, Alexandra Weber, Khrystyna Shchubelka, Olga T. Oleksyk, Olga Levchuk, Alla Patrus, Nelya Lazar, Stephanie O. Castro-Marquez, Patricia Boldyzhar, Alina Urbanovych, Viktoriya Stakhovska, Kateryna Malyar, Svitlana Chervyakova, Olena Podoroha, Natalia Kovalchuk, Yaroslava Hasynets, Juan L. Rodriguez-Flores, Sarah Medley, Fabia Battistuzzi, Ryan Liu, Yong Hou, Siru Chen, Huanming Yang, Meredith Yeager, Michael Dean, Ryan E. Mills, Volodymyr Smolanka

The authors have withdrawn this version their manuscript due to lack of consent for usage of all the data analyzed in this preprint. Specifically, some of the data used has been removed from the public domain after the publication. Therefore, the authors do not wish this work to be cited as reference for the project. If you have any questions, please contact the corresponding author.
